# Supplementary material for: Genome-wide association and selective sweep analyses reveal genetic loci for FCR of egg production traits in ducks
Source: PubMed Central journal article supplement (PMC8690979; doi:10.1186/s12711-021-00684-5), 2021-12-20

Chr1

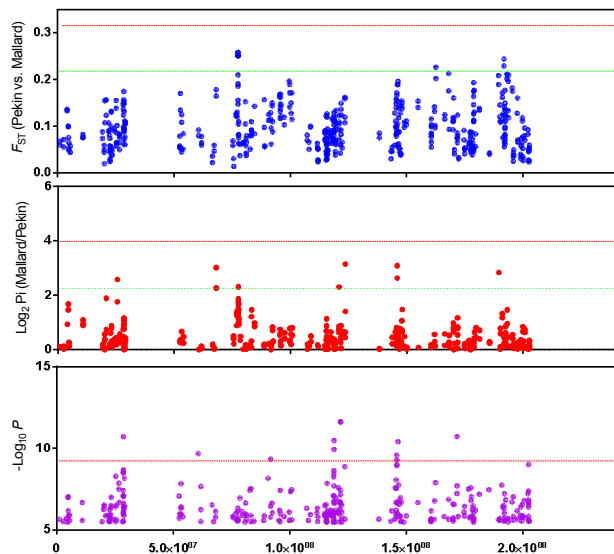

Chr2

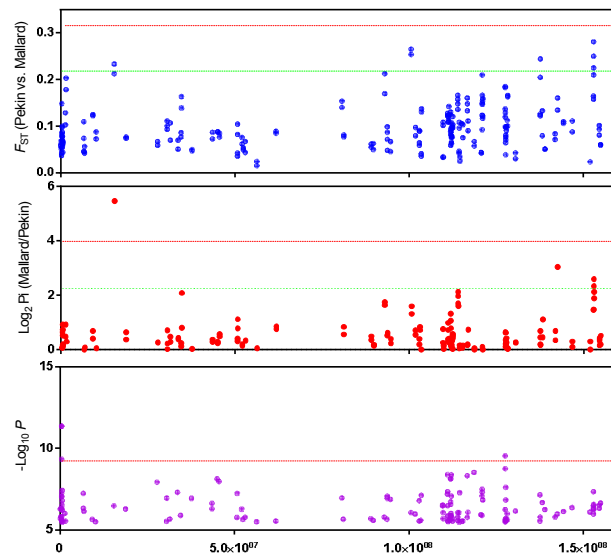

Chr4

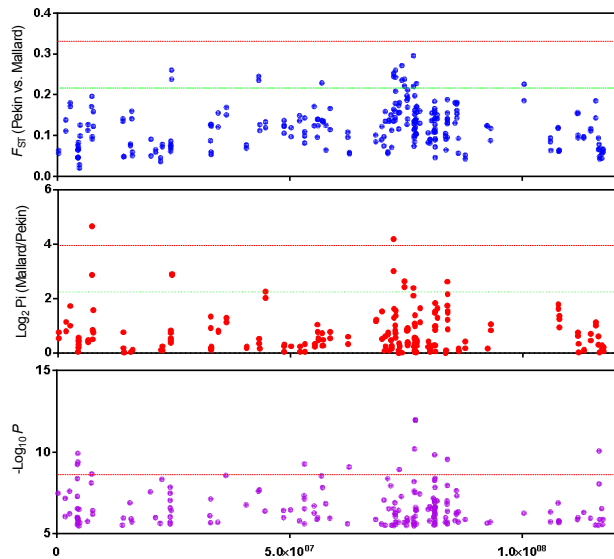

Chr5

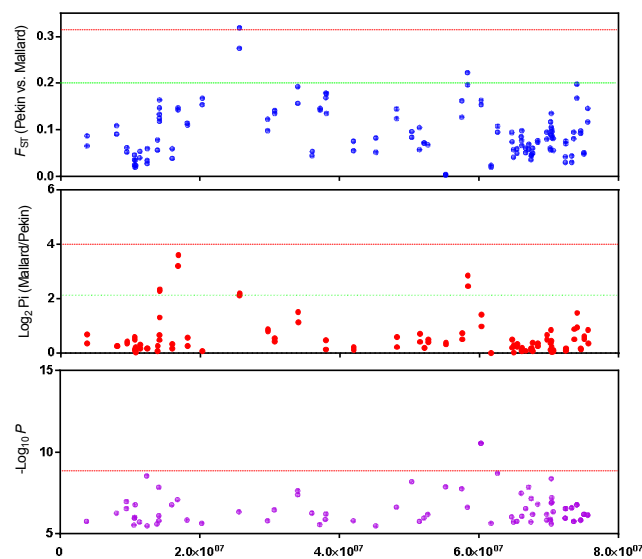

Chr7

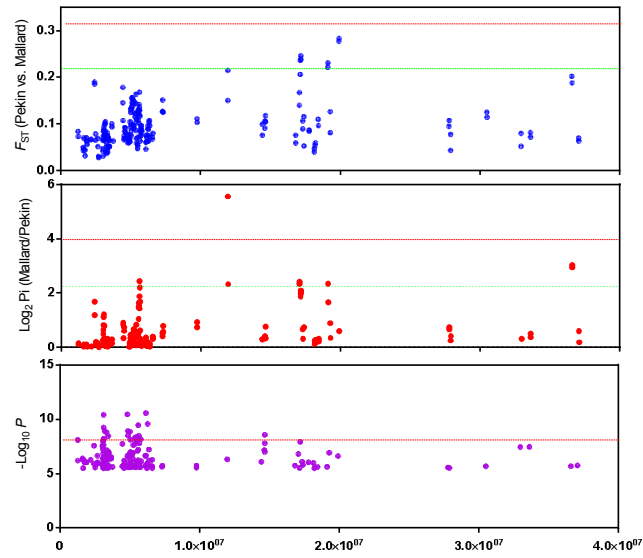

Chr8

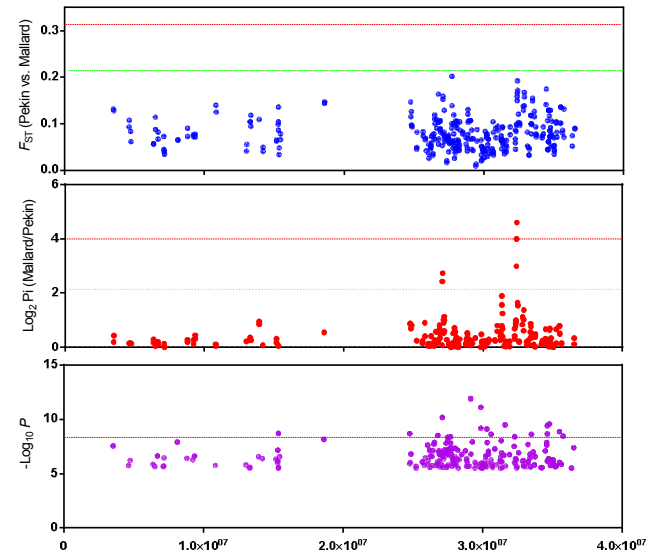

Chr9

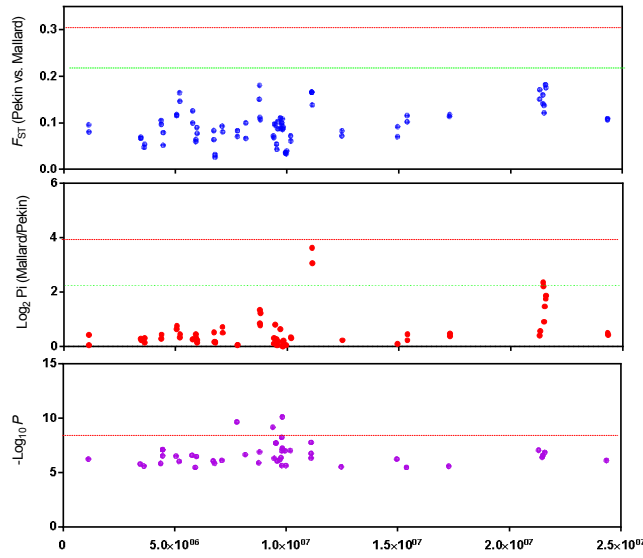

Chr24

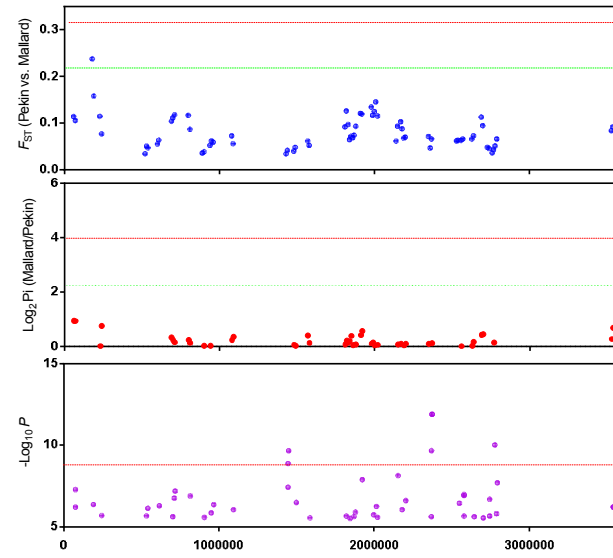

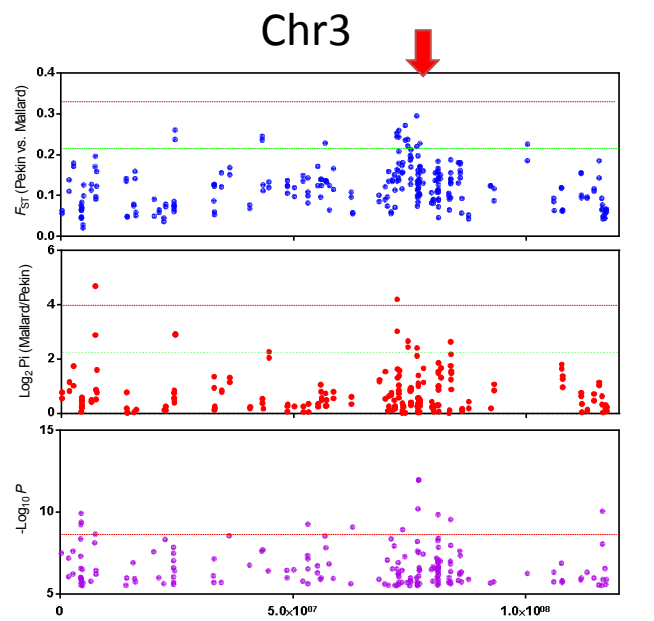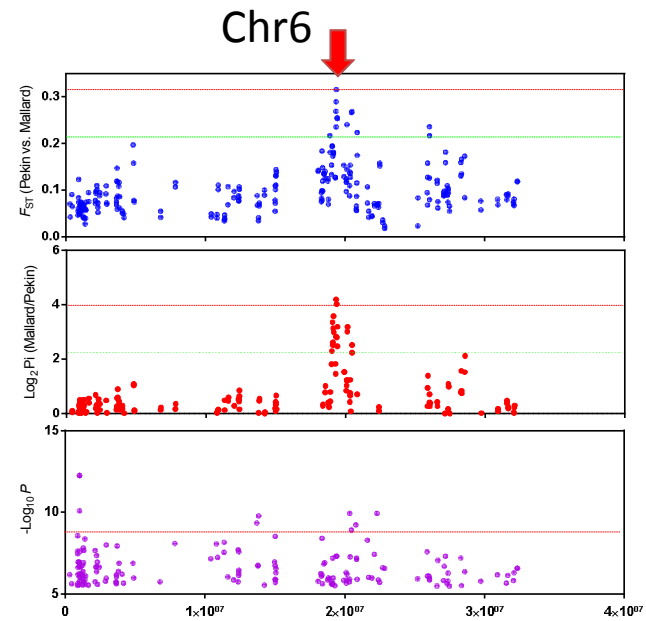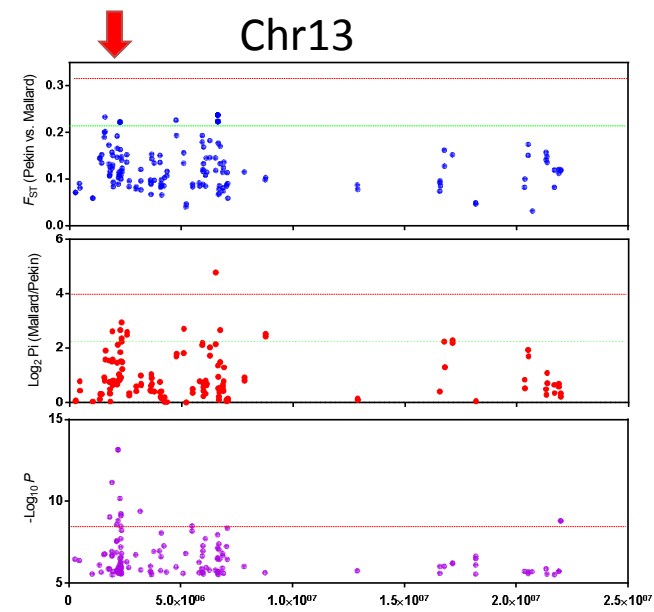

Supplement: 12711_2021_684_MOESM9_ESM.pdf [file 12711_2021_684_MOESM9_ESM.pdf]
